# Supplementary material for: Hematopoietic stem and progenitor cells use podosomes to transcellularly cross the bone marrow endothelium
Source: PubMed Central journal article supplement — Haematologica. 2020 Jan 23;105(12):2746–56. doi: 10.3324/haematol.2018.196329 (PMC7716366; doi:10.3324/haematol.2018.196329), 2020-01-23
Supplement: 2018_196329-Disclosures_Contributions.pdf [file 2018_196329-Disclosures_Contributions.pdf]

Haematologica  
HAEMATOL/2018/196329  
Version 4

Hematopoietic stem and progenitor cells use podosomes to  
transcellularly cross the bone marrow endothelium.

Timo Rademakers, Marieke Goedhart, Mark Hoogenboezem,  
Alexander García Ponce, Jos van Rijssel, Maryna Samus, Michael  
Schnoor, Stefan Butz, Stephan Huveneers, Dietmar Vestweber, Martijn  
A. Nolte, Carlijn Voermans, and Jaap D. van Buul

Disclosures: AGP received a pre-doctoral scholarship from the Mexican National Council for Science and Technology (Conacyt, 369767); and a travel fellowship grant from the Journal of Cell Science, The Company of Biologists Limited ([www.biologists.com](http://www.biologists.com)) to realize a research stay in the lab of JDvB. Work in the lab of MS is funded by Conacyt (grant 233395). This work was supported by Sanquin Research (PPOC13-030P grant).

Contributions: TR and MG designed and performed experiments, analyzed data, interpreted results and wrote the manuscript. TR and MG contributed equally as first authors. AGP performed experiments, analyzed data and interpreted results. MH, JvR, MSa and SB performed experiments and provided assistance. SH, CV, DV, MS and MAN interpreted results, discussed the manuscript and provided pivotal resources. JDvB funded the project, provided the concept, designed experiments, interpreted results and wrote the manuscript.
